# Supplementary material
Source: HighWire-hosted journal article supplement (https://dmd.aspetjournals.org/highwire/filestream/79975/field_highwire_adjunct_files/0/1096_supp_data.pdf)
Supplement: 1096_supp_data.pdf [file 1096_supp_data.pdf]

## **Drug Metabolism and Disposition**

**DMD-AR-2022-001096**

### **Supplementary data**

#### **Absorption, Metabolism, and Excretion of Taselisib (GDC-0032), a Potent $\beta$ -sparing PI3K**

#### **Inhibitor, in Rats, Dogs, and Humans**

Shuguang Ma<sup>\*</sup>,<sup>1</sup>, Sungjoon Cho<sup>\*</sup>, Srikumar Sahasranaman<sup>2</sup>, Weiping Zhao, Jodie Pang, Xiao Ding, Brian Dean, Bin Wang<sup>3</sup>, Jerry Y. Hsu<sup>4</sup>, Joseph Ware<sup>5</sup>, Laurent Salphati

Department of Drug Metabolism and Pharmacokinetics (SM, SC, WZ, JP, XD, BD, LS) and

Department of Clinical Pharmacology (SS, JH, JW), Genentech, Inc., 1 DNA Way, South San Francisco, CA, 94080; XenoBiotic Laboratories (BW), Inc., 107 Morgan Lane, Plainsboro, NJ 08536

<sup>\*</sup> Contributed equally

<sup>1</sup>Current affiliation: Pharmacokinetics and Drug Metabolism, Amgen, Inc., South San Francisco, CA

<sup>2</sup>Current affiliation: Clinical Pharmacology, BeiGene, San Mateo, CA

<sup>3</sup>Current affiliation: Ingredient Research, The Coca-Cola Company, Atlanta, GA

<sup>4</sup>Current affiliation: Clinical Development, ArriVent Biopharma, Burlingame, CA

<sup>5</sup>Current affiliation: Clinical Pharmacology, Seagen, South San Francisco, CA

Corresponding author:

Laurent Salphati, Pharm.D., Ph.D.

Drug Metabolism and Pharmacokinetics, Genentech, Inc., 1 DNA Way, South San Francisco, CA  
94080. Phone: 650-467-1796. Email: [salphati.laurent@gene.com](mailto:salphati.laurent@gene.com)

**Supplementary Table S1. Summary of structures and mass fragmentation for metabolites of Taselisib in rats, dogs and humans.**

| Analyte                                 | Observed MH <sup>+</sup><br>(Chemical formula)                                                                | Source                                               | Structure                                                                                                                                                                                                                                                                                                           |
|-----------------------------------------|---------------------------------------------------------------------------------------------------------------|------------------------------------------------------|---------------------------------------------------------------------------------------------------------------------------------------------------------------------------------------------------------------------------------------------------------------------------------------------------------------------|
| Taselisib                               | 461.2408<br>(C <sub>24</sub> H <sub>29</sub> N <sub>8</sub> O <sub>2</sub> <sup>+</sup> )                     | Rat: P, U, F, B<br>Dog: P, U, F, B<br>Human: P, U, F | 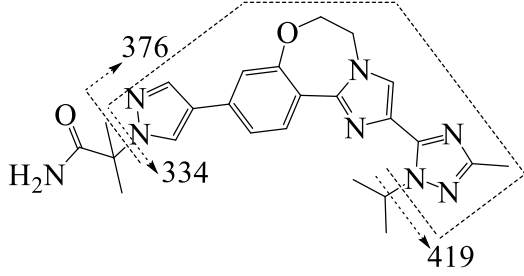                                                                                                                                                                                                                                  |
| M1<br>(Oxidation to<br>carboxylic acid) | *493.2182<br>( <sup>14</sup> CC <sub>23</sub> H <sub>27</sub> N <sub>8</sub> O <sub>4</sub> <sup>+</sup> )    | Rat: B                                               |  <p>[M+H]<sup>+</sup>=493<br/> 491-H<sub>2</sub>O= 473<br/> 493-CO<sub>2</sub>=449<br/> 449-NH<sub>3</sub>=432<br/> 449-C<sub>3</sub>H<sub>6</sub>=407<br/> 432-CO=404<br/> 449-NH<sub>3</sub>-C<sub>3</sub>H<sub>6</sub>=39</p> |
| M2<br>(Glutathione<br>conjugation)      | *768.3123<br>( <sup>14</sup> CC <sub>33</sub> H <sub>44</sub> N <sub>11</sub> O <sub>8</sub> S <sup>+</sup> ) | Rat: B                                               |                                                                                                                                                                                                                                 |

**Supplementary Table S1 (continued). Summary of structures and mass fragmentation for metabolites of Taselisib in rats, dogs and humans.**

| Analyte                             | Observed MH <sup>+</sup><br>(Chemical formula)                                                             | Source                | Structure |
|-------------------------------------|------------------------------------------------------------------------------------------------------------|-----------------------|-----------|
| M3<br>(oxidation)                   | *479.2389<br>( <sup>14</sup> CC <sub>23</sub> H <sub>29</sub> N <sub>8</sub> O <sub>3</sub> <sup>+</sup> ) | Rat: B                |           |
| M4<br>(oxidation & glucuronidation) | *655.2713<br>( <sup>14</sup> CC <sub>29</sub> H <sub>37</sub> N <sub>8</sub> O <sub>9</sub> <sup>+</sup> ) | Rat: B                |           |
| M5<br>(Di-oxidation)                | 493.2306<br>(C <sub>24</sub> H <sub>29</sub> N <sub>8</sub> O <sub>4</sub> <sup>+</sup> )                  | Rat: F, B<br>Human: F |           |
| M6<br>(Oxidative ring opening)      | 493.2306<br>(C <sub>24</sub> H <sub>29</sub> N <sub>8</sub> O <sub>4</sub> <sup>+</sup> )                  | Rat: B<br>Human: F    |           |

**Supplementary Table S1. Summary of structures and mass fragmentation for metabolites of Taselisib in rats, dogs and humans.**

| Analyte                       | Observed MH <sup>+</sup><br>(Chemical formula)                                                               | Source                                            | Structure |
|-------------------------------|--------------------------------------------------------------------------------------------------------------|---------------------------------------------------|-----------|
| M7<br>(Oxidation & sulfation) | *559.1958<br>( <sup>14</sup> CC <sub>23</sub> H <sub>29</sub> N <sub>8</sub> O <sub>6</sub> S <sup>+</sup> ) | Rat: B                                            |           |
| M8<br>(Oxidation)             | *479.2390<br>( <sup>14</sup> CC <sub>23</sub> H <sub>29</sub> N <sub>8</sub> O <sub>3</sub> <sup>+</sup> )   | Rat: U                                            |           |
| M9<br>(Amide hydrolysis)      | *462.2248<br>(C <sub>24</sub> H <sub>28</sub> N <sub>7</sub> O <sub>3</sub> <sup>+</sup> )                   | Rat: F, B<br>Dog: P, U, F, B<br>Human: U, F       |           |
| M10<br>(Oxidation)            | 477.2370<br>(C <sub>24</sub> H <sub>29</sub> N <sub>8</sub> O <sub>3</sub> <sup>+</sup> )                    | Rat: P, U, F, B<br>Dog: P, U, F, B<br>Human: U, F |           |

**Supplementary Table S1 (continued). Summary of structures and mass fragmentation for metabolites of Taselisib in rats, dogs and humans.**

| Analyte                             | Observed MH <sup>+</sup><br>(Chemical formula)                                                             | Source                                         | Structure |
|-------------------------------------|------------------------------------------------------------------------------------------------------------|------------------------------------------------|-----------|
| M11<br>(Oxidation)                  | 477.2359<br>(C <sub>24</sub> H <sub>29</sub> N <sub>8</sub> O <sub>3</sub> <sup>+</sup> )                  | Rat: U, F, B<br>Dog: P, U, F, B<br>Human: U, F |           |
| M12<br>(Acetylation & ring opening) | *479.2392<br>( <sup>14</sup> CC <sub>23</sub> H <sub>29</sub> N <sub>8</sub> O <sub>3</sub> <sup>+</sup> ) | Rat: B                                         |           |
| M13 (Oxidation & glucuronidation)   | *655.2710<br>( <sup>14</sup> CC <sub>29</sub> H <sub>37</sub> N <sub>8</sub> O <sub>9</sub> <sup>+</sup> ) | Rat: U, F, B                                   |           |
| M14<br>(Methylation & Oxidation)    | 491.2526<br>(C <sub>25</sub> H <sub>31</sub> N <sub>8</sub> O <sub>3</sub> <sup>+</sup> )                  | Dog: P, U, F, B                                |           |

**Supplementary Table S1 (continued). Summary of structures and mass fragmentation for metabolites of Taselisib in rats, dogs and humans.**

| Analyte                              | Observed<br>MH <sup>+</sup><br>(Chemical<br>formula)                                      | Source          | Structure |
|--------------------------------------|-------------------------------------------------------------------------------------------|-----------------|-----------|
| M15<br>(Methylation &<br>hydrolysis) | 476.2416<br>(C <sub>25</sub> H <sub>30</sub> N <sub>7</sub> O <sub>3</sub> <sup>+</sup> ) | Dog: P, U, F, B |           |
| M16<br>(Methylation &<br>oxidation)  | 491.2525<br>(C <sub>25</sub> H <sub>31</sub> N <sub>8</sub> O <sub>3</sub> <sup>+</sup> ) | Dog: P, U, F, B |           |
| M17<br>(Methylation)                 | 475.2571<br>(C <sub>25</sub> H <sub>31</sub> N <sub>8</sub> O <sub>2</sub> <sup>+</sup> ) | Dog: P, U, F, B |           |

\*; m/z values of an analyte and its fragments were based on [<sup>14</sup>C] compounds.

**Supplementary Table S2.  $^1\text{H}$  and  $^{13}\text{C}$  NMR Data for GDC-0032 and M17 ( $\delta$  in ppm)**

| Position | GDC-0032 <sup>a</sup> |                                          | M17 <sup>a</sup> |                                          |
|----------|-----------------------|------------------------------------------|------------------|------------------------------------------|
|          | $^{13}\text{C}$       | $^1\text{H}$ , multiplicity ( $J$ in Hz) | $^{13}\text{C}$  | $^1\text{H}$ , multiplicity ( $J$ in Hz) |
| 1        | 131.8                 | 8.41, d (8.4)                            | 131.8            | 8.43, d (8.4)                            |
| 2        | 121.0                 | 7.37, dd (1.8,8.4)                       | 120.8            | 7.41, dd (1.8,8.4)                       |
| 3        | 117.3                 | ---                                      | 116.2            | ---                                      |
| 4        | 118.1                 | 7.30, d (1.8)                            | 118.0            | 7.36, d (1.8)                            |
| 5        | 158.0                 | ---                                      | 158.3            | ---                                      |
| 6        | 136.4                 | ---                                      | 137.1            | ---                                      |
| 7        | 146.8                 | ---                                      | 148.8            | ---                                      |
| 9        | 131.3                 | ---                                      | 122.2            | ---                                      |
| 10       | 124.8                 | 7.71, s                                  | 128.9            | 8.19, s                                  |
| 12       | 51.5                  | 4.52, m                                  | 51.7             | 4.64, m                                  |
| 13       | 70.0                  | 4.52, m                                  | 69.5             | 4.59, m                                  |
| 14       | 123.2                 | ---                                      | 122.8            | ---                                      |
| 15       | 138.8                 | 7.97, brs                                | 138.6            | 7.99, brs                                |
| 18       | 127.5                 | 8.27, d (0.5)                            | 127.3            | 8.29, d (0.5)                            |
| 19       | 66.6                  | ---                                      | 66.2             | ---                                      |
| 20       | 177.9                 | ---                                      | 177.7            | ---                                      |
| 21       | 26.4                  | 1.86, s                                  | 26.0             | 1.87, s                                  |
| 22       | 26.4                  | 1.86, s                                  | 26.0             | 1.87, s                                  |
| 23       | 149.5                 | ---                                      | 146.4            | ---                                      |
| 26       | 160.3                 | ---                                      | 154.7            | ---                                      |
| 28       | 52.4                  | 5.91, sep (6.6)                          | 55.4             | 5.52, sep (6.6)                          |
| 29       | 22.7                  | 1.54, d (6.6)                            | 21.8             | 1.62, d (6.6)                            |
| 30       | 22.7                  | 1.54, d (6.6)                            | 21.8             | 1.62, d (6.6)                            |
| 31       | 13.7                  | 2.36, s                                  | 10.6             | 2.64, s                                  |
| 32       |                       |                                          | 33.6             | 3.95, s                                  |
|          |                       |                                          |                  |                                          |

<sup>a</sup>. Measured in methanol- $d_4$  with  $^1\text{H}$  at 500 MHz, and  $^{13}\text{C}$  at 125 MHz. The  $^{13}\text{C}$  NMR signals for M17 were indirect from HSQC and/or HMBC spectra.

d: doublet; dd: double doublet; s: singlet; brs: broad singlet; sep: septet; m: multiplet.



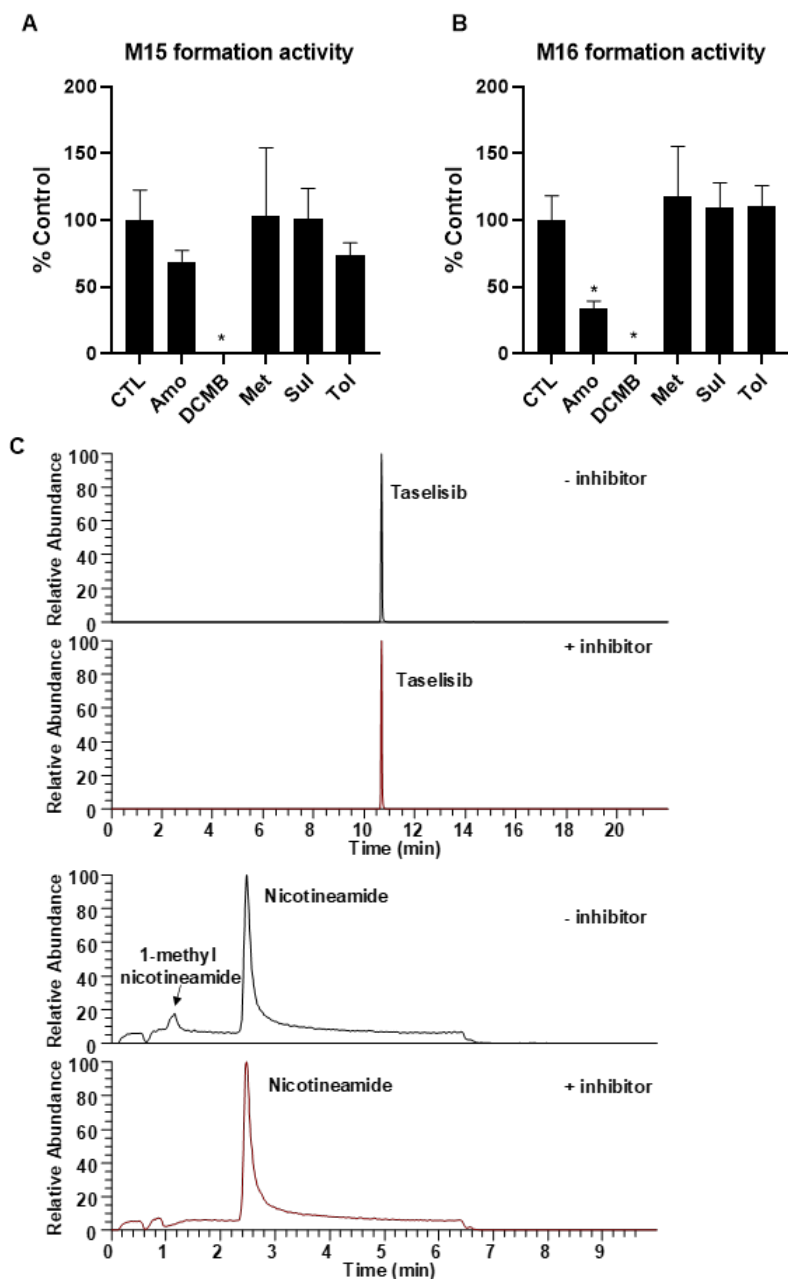

**Supplementary Figure S1. Characterization of methyltransferase involved in inavolisib**

**metabolism in dogs.** (A & B) Taselisib was incubated with dog hepatocytes in the presence of various human methyltransferase inhibitors for 3 h: Amo; amodiaquine (HNMT inhibitor), DCMB; 2,3-dichloromethylbenzylamine (TMT inhibitor), Met; 1-methyl nicotinamide (NNMT inhibitor), Sul; sulfasalazine (TPMT inhibitor), Tol; tolcapone (COMT inhibitor). (C) Recombinant NNMT was incubated with taselisib or nicotine amide for 1 hours in the presence of 5-amino-1-methylquinolin-1-ium iodide (NNMT inhibitor). \*:  $p < 0.05$  compared to CTL from student t-test.
